# Supplementary material for: Transcatheter hepatic arterial chemoembolization and sorafenib for hepatocellular carcinoma: a meta-analysis of randomized, double-blind controlled trials
Source: PubMed Central journal article supplement (PMC5601759; doi:10.18632/oncotarget.19334), 2017-07-18
Supplement: oncotarget-08-59601-s001.pdf [file oncotarget-08-59601-s001.pdf]

# **Transcatheter hepatic arterial chemoembolization and sorafenib for hepatocellular carcinoma: a meta-analysis of randomized, double-blind controlled trials**

## **SUPPLEMENTARY MATERIALS**

**Supplementary Table 1: PRISMA checklist.** See Supplementary\_Table\_1
